# Supplementary material for: Sequential reinforcement of intra/interlayer interfaces to design flexible, transparent electromagnetic interference shielding film for “Green Electronics”
Source: Royal Society of Chemistry journal article supplement (doi:10.1039/d4ta04412f), 2024-01-01
Supplement: d4ta04412f1.pdf [file d4ta04412f1.pdf]

Supporting Information

**Sequential Reinforcement of Intra/Interlayer Interfaces  
to Design Flexible, Transparent Electromagnetic  
Interference Shielding Film for “Green Electronics”**

Gao Deng,<sup>a</sup> Xin Sun,<sup>b</sup> Xufeng Li,<sup>a</sup> Zhenyang Li,<sup>a</sup> Haihan Zou,<sup>a</sup> Peng Yi,<sup>a</sup> Ming Fang,<sup>a</sup>  
Chunyan Chen,<sup>a</sup> Junzhe He,<sup>ab</sup> Jianglan Shui,<sup>a</sup> Ronghai Yu<sup>\*a</sup> and Xiaofang Liu<sup>\*a</sup>

<sup>a</sup> *School of Materials Science and Engineering, Beihang University, Beijing, 100191, PR  
China*

<sup>b</sup> *Science and Technology on Electromagnetic Scattering Laboratory, Beijing Institute of  
Environmental Features, Beijing 100854, PR China*

*\* Corresponding authors: Ronghai Yu (Email: rhyu@buaa.edu.cn), Xiaofang Liu (Email:  
liuxf05@buaa.edu.cn)*

Supplementary Information contains:

1. Supplementary Fig. S1–S21
2. Supplementary Table S1-S4
3. Supplementary References

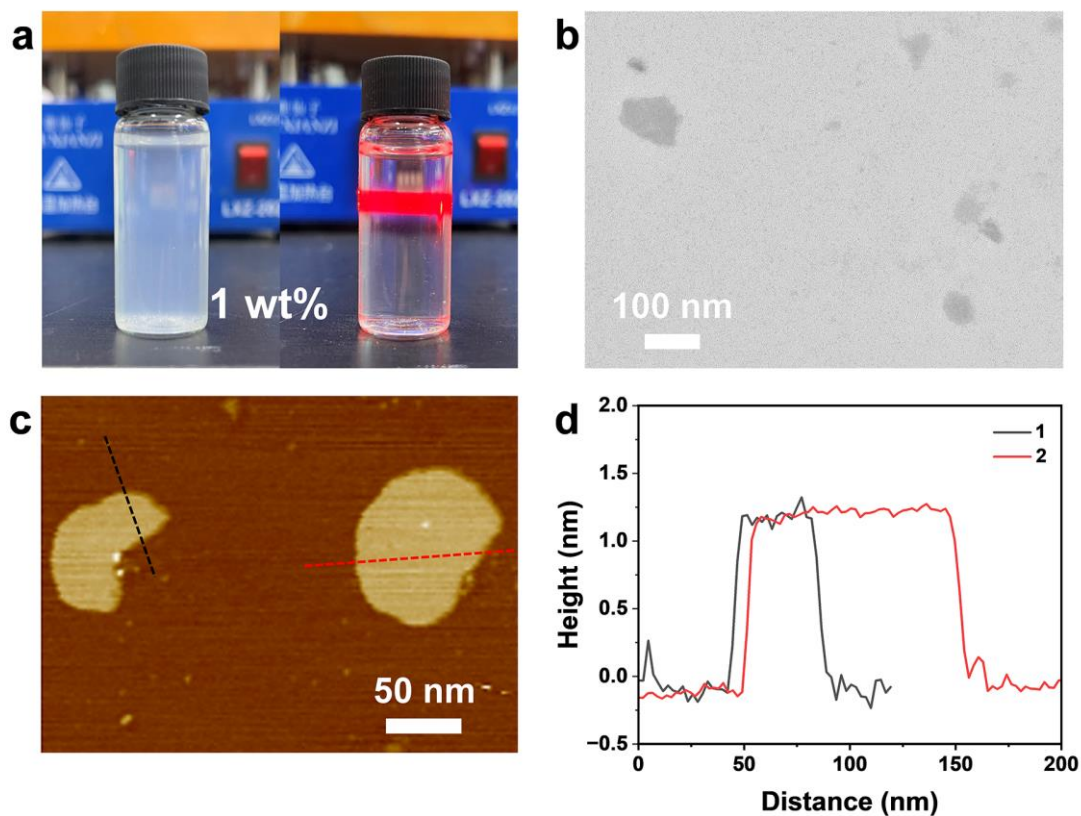

**Fig. S1** (a) Digital photo of nanoclay dispersion before (left) and after (right) exfoliation. (b) TEM image, (c) AFM image, and (d) height profile of exfoliated nanoclay platelets.

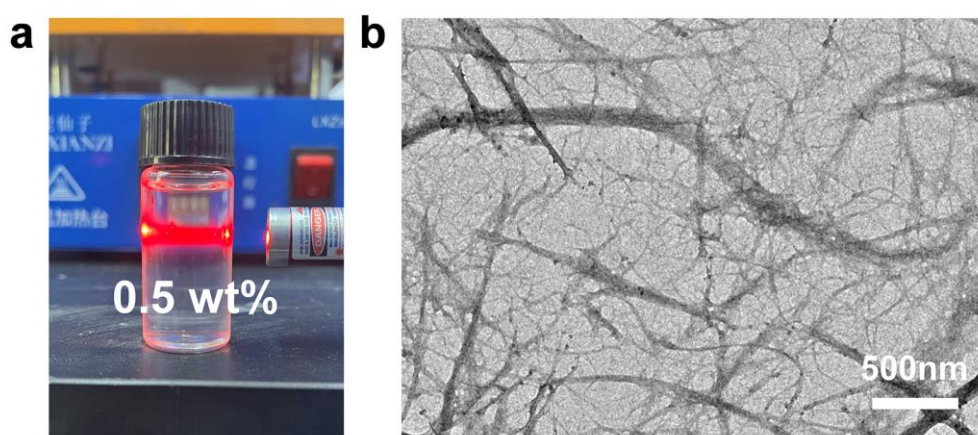

**Fig. S2** (a) Digital photo of CNF dispersion. (b) TEM image of TEMPO-oxidized CNFs.

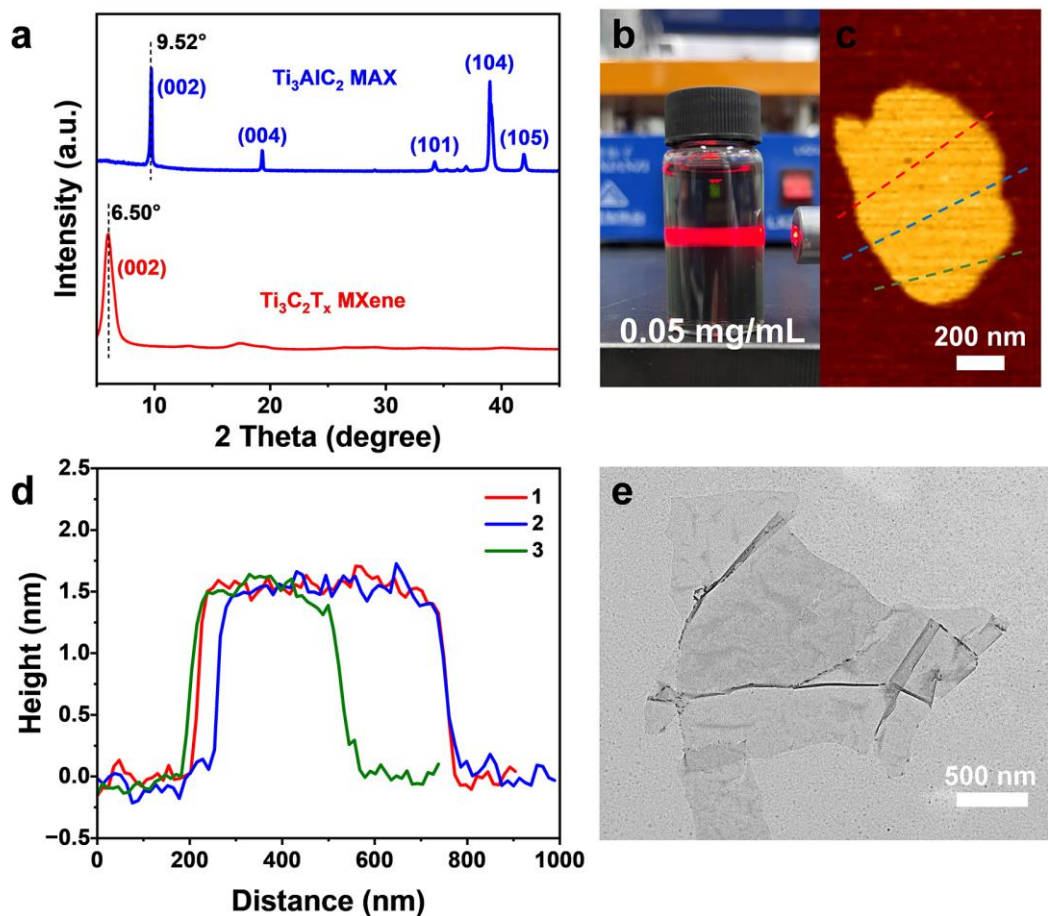

**Fig. S3** (a) XRD patterns of MXene nanosheets and  $\text{Ti}_3\text{AlC}_2$  powder. (b) Digital photo of MXene dispersion. (c) AFM image, (d) height profile, and (e) TEM image of MXene nanosheet.

As shown in the XRD patterns, the characteristic peaks of MAX powders at  $39.17^\circ$  disappear after exfoliation. The (002) diffraction peak shifts from  $9.52^\circ$  towards  $6.50^\circ$ , which is attributed to the increased interlayer spacing. These results reveal the successful exfoliation of MXene nanosheets.

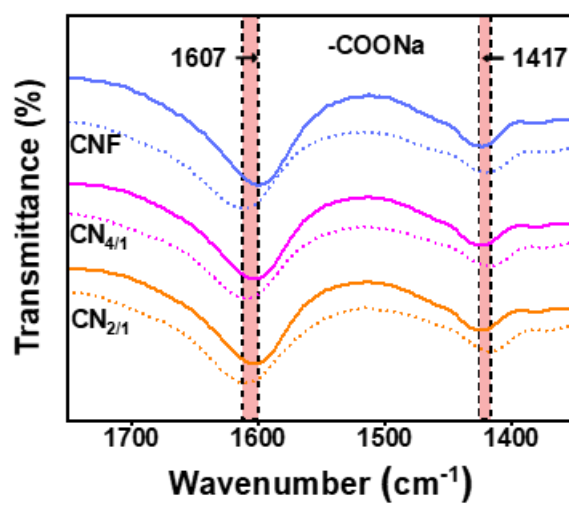

**Fig. S4** FTIR spectra of CNF, CN<sub>4/1</sub>, CN<sub>2/1</sub> films with Ca<sup>2+</sup> (solid lines) and without Ca<sup>2+</sup> (dotted lines).

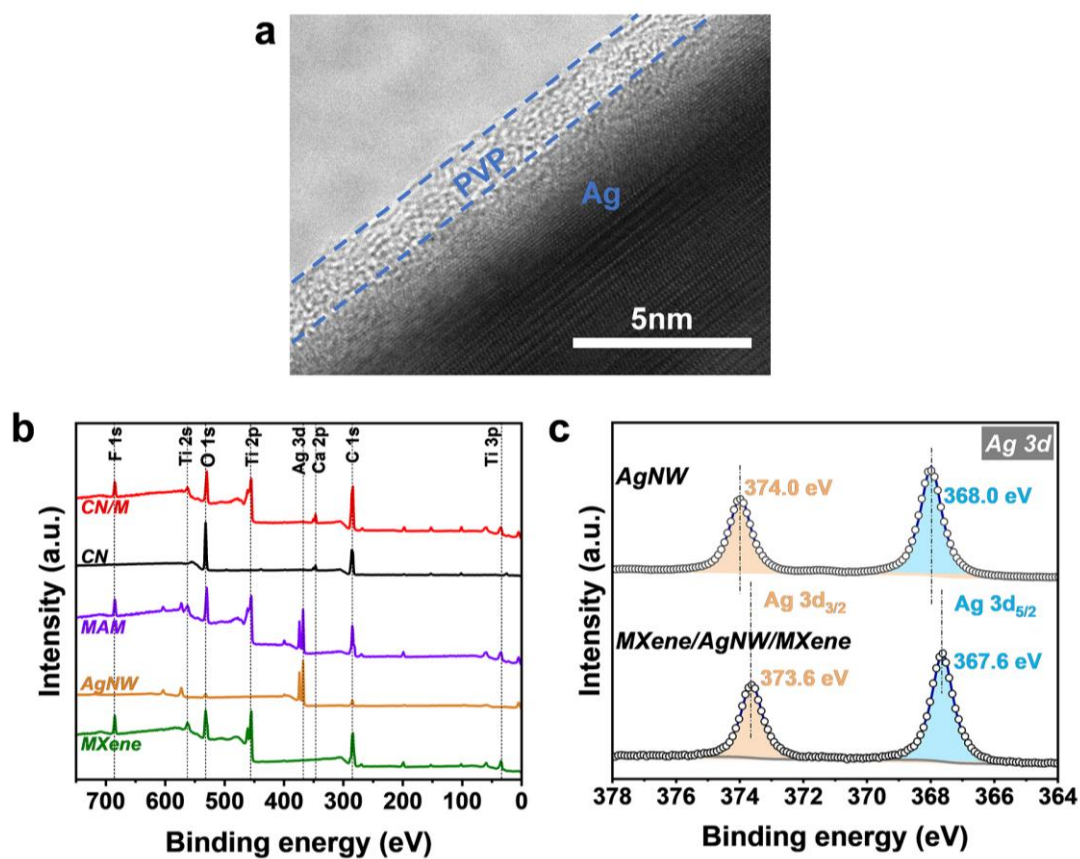

**Fig. S5** (a) High-resolution TEM image of AgNW. (b) XPS survey spectra of different films. (c) High-resolution Ag 3d XPS spectra of AgNWs and MXene/AgNW/MXene film.

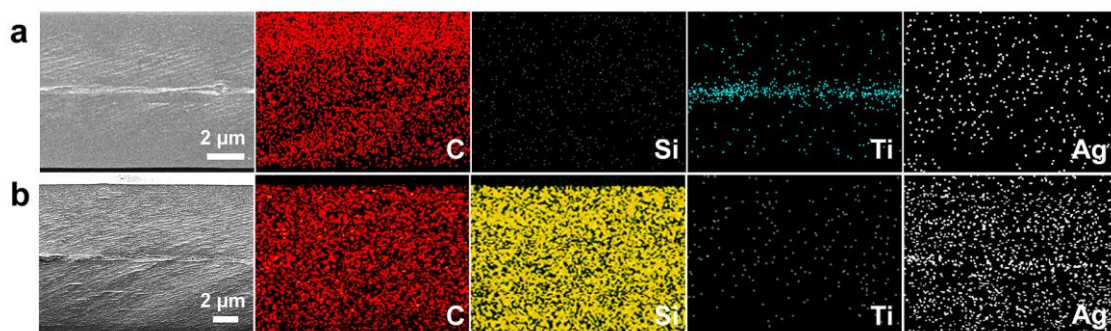

**Fig. S6** SEM images and corresponding EDS elemental mappings of the cross-sections of (a) C/MAM/C and (b) CN<sub>2/1</sub>/A/CN<sub>2/1</sub> films.

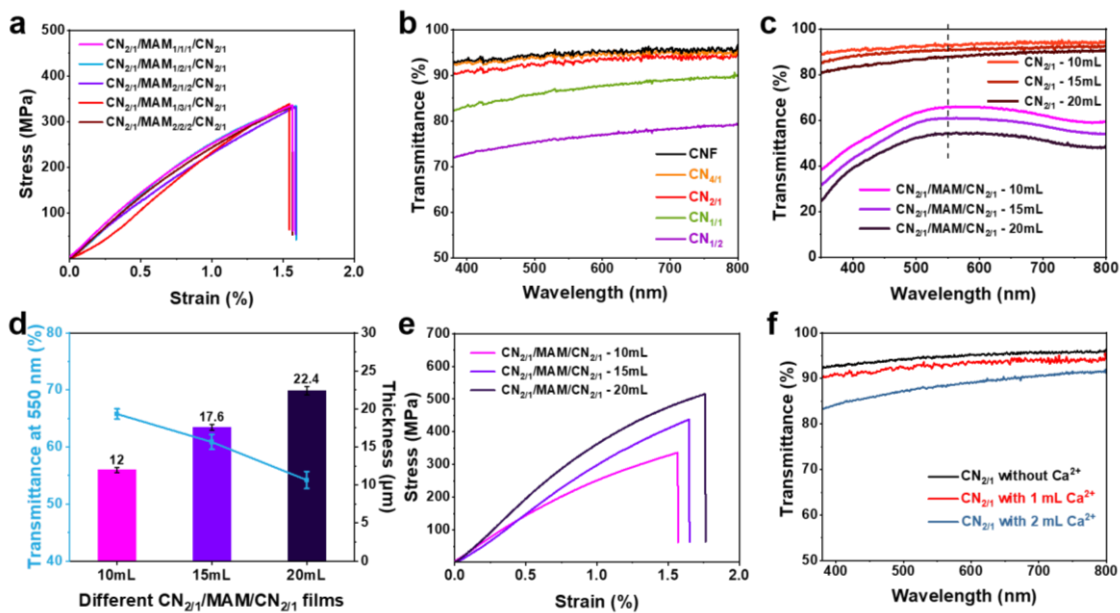

**Fig. S7** (a) Stress-strain curves of different CN<sub>2/1</sub>/MAM<sub>α/β/α</sub>/CN<sub>2/1</sub> films. (b) Visible-light transmittance curves of CN<sub>x/y</sub> films with different component ratios. (c) Visible-light transmittance curves, (d) thickness and optical transmittance at 550 nm wavelength, and (e) stress-strain curves of CN<sub>2/1</sub>/MAM/CN<sub>2/1</sub> films with different substrate thickness. (f) Visible-light transmittance curves of CN<sub>2/1</sub> films with different amounts of Ca<sup>2+</sup>.

For Fig. S7c-e, the composite films were prepared using different amounts of CN suspension. In experiment, we fixed the compositions of substrate (CN<sub>2/1</sub>) and conductive layer (MAM<sub>1/1/1</sub>), and prepared three films with the CN suspensions of 10, 15 and 20 ml, respectively. As the thickness of substrate increases, the tensile strength and elongation at break of composite film increase, while the transmittance decreases. Therefore, the optimal thickness of the substrate should be the thinnest among the three samples (i.e. CN suspension of 10 ml).

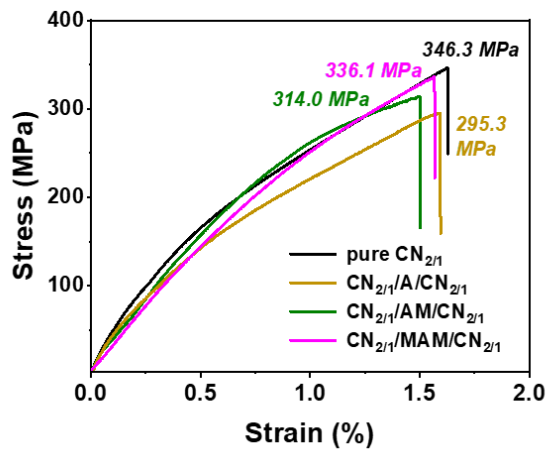

**Fig. S8** Stress-strain curves of pure  $\text{CN}_{2/1}$ ,  $\text{CN}_{2/1}/\text{A}/\text{CN}_{2/1}$ ,  $\text{CN}_{2/1}/\text{AM}/\text{CN}_{2/1}$  and  $\text{CN}_{2/1}/\text{MAM}/\text{CN}_{2/1}$ .

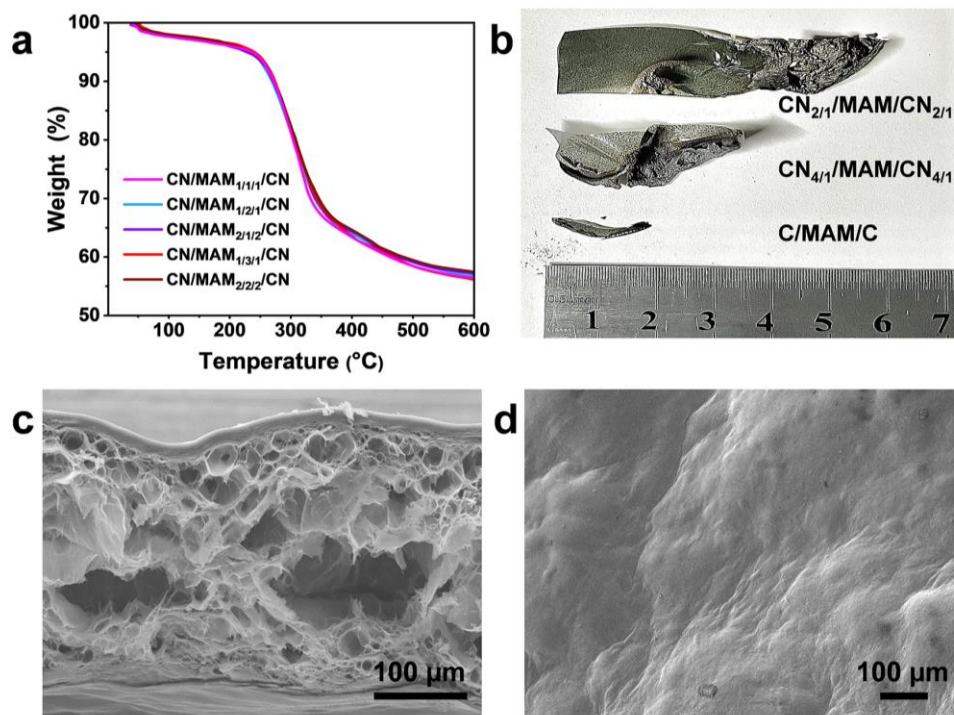

**Fig. S9** (a) TGA curves of different  $\text{CN}_{2/1}/\text{MAM}_{\alpha/\beta/\alpha}/\text{CN}_{2/1}$  films measured under nitrogen atmosphere. (b) Digital photos of the residues of different films after vertical flame combustion test. (c, d) SEM images of the cross-section and surface of  $\text{CN}_{2/1}/\text{MAM}/\text{CN}_{2/1}$  residue.

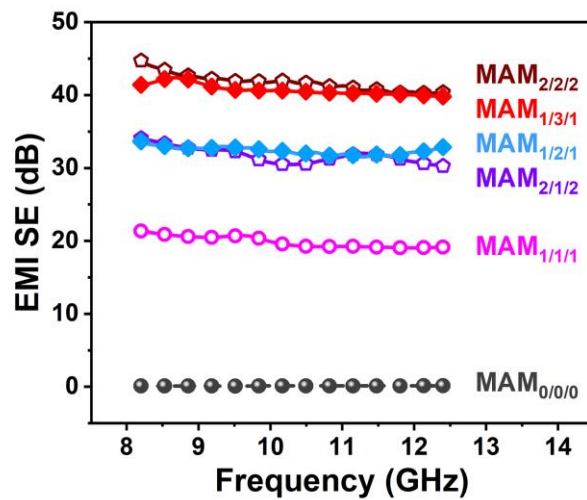

Fig. S10 EMI SE curves of different CN/MAM $_{\alpha/\beta/\alpha}$ /CN films.

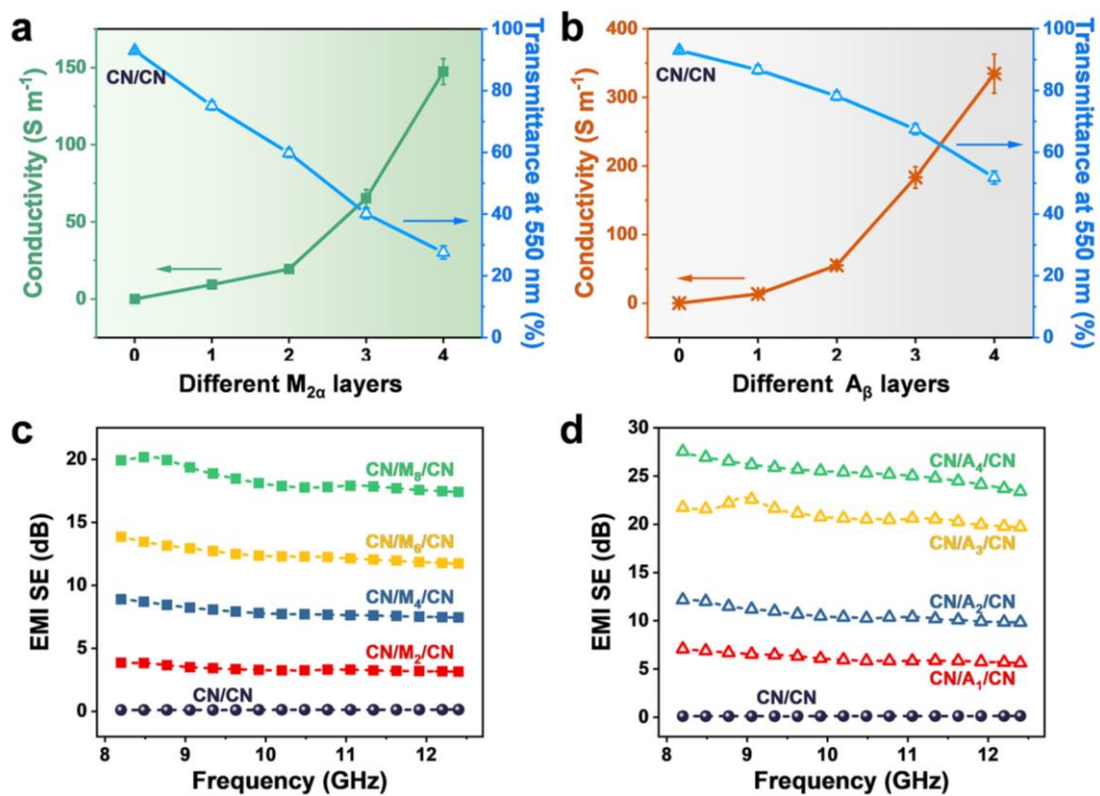

Fig. S11 (a) Conductivity of  $M_{2\alpha}$  layers and optical transmittance at 550 nm of CN/ $M_{2\alpha}$ /CN films. (b) Conductivity of  $A_{\beta}$  layers and optical transmittance at 550 nm of CN/ $A_{\beta}$ /CN films. (c) EMI SE curves of CN/ $M_{2\alpha}$ /CN films. (d) EMI SE curves of CN/ $A_{\beta}$ /CN films.



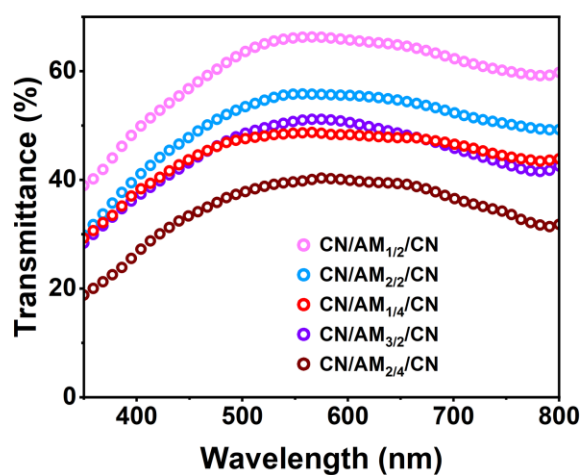

Fig. S12 Optical transmittance curves of CN/AM<sub>β/2α</sub>/CN films.

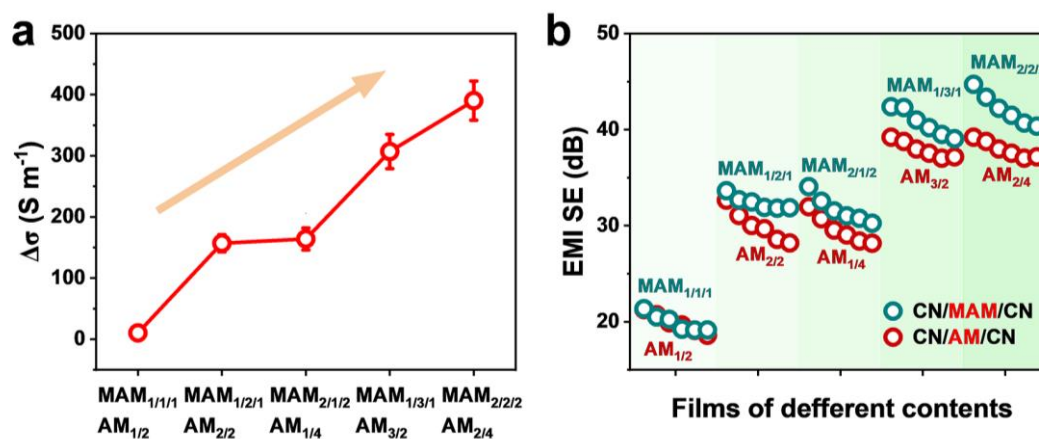

Fig. S13 (a) Difference in conductivity  $\Delta\sigma$  [i.e.  $\sigma_{(MAM)} - \sigma_{(AM)}$ ] between the two conductive layers. (b) EMI SE of CN/MAM<sub>α/β/α</sub>/CN and CN/AM<sub>β/2α</sub>/CN films.

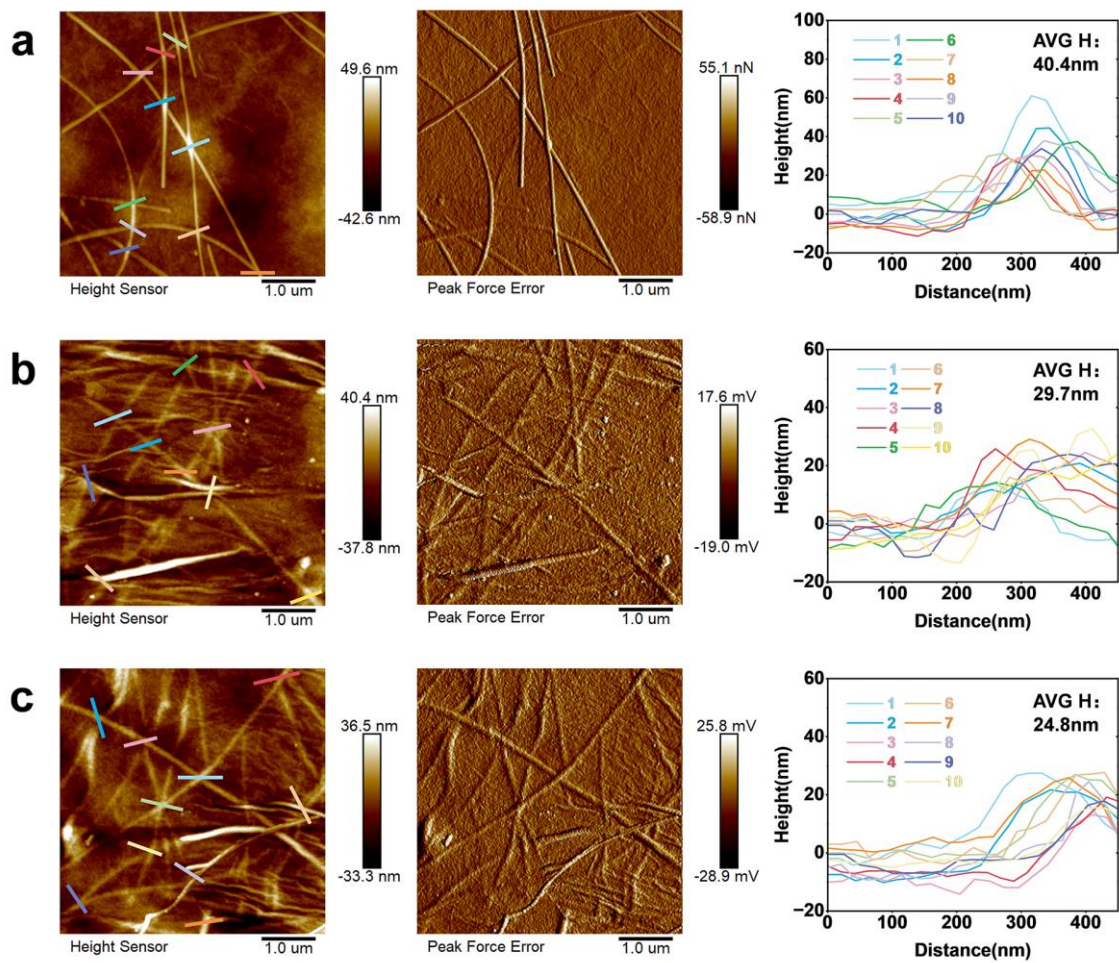

**Fig. S14** AFM images and height statistics of AgNW junctions in (a) CN/A<sub>1</sub> film, (b) CN/AM<sub>1/2</sub> film, and (c) CN/MAM<sub>1/1/1</sub> film.

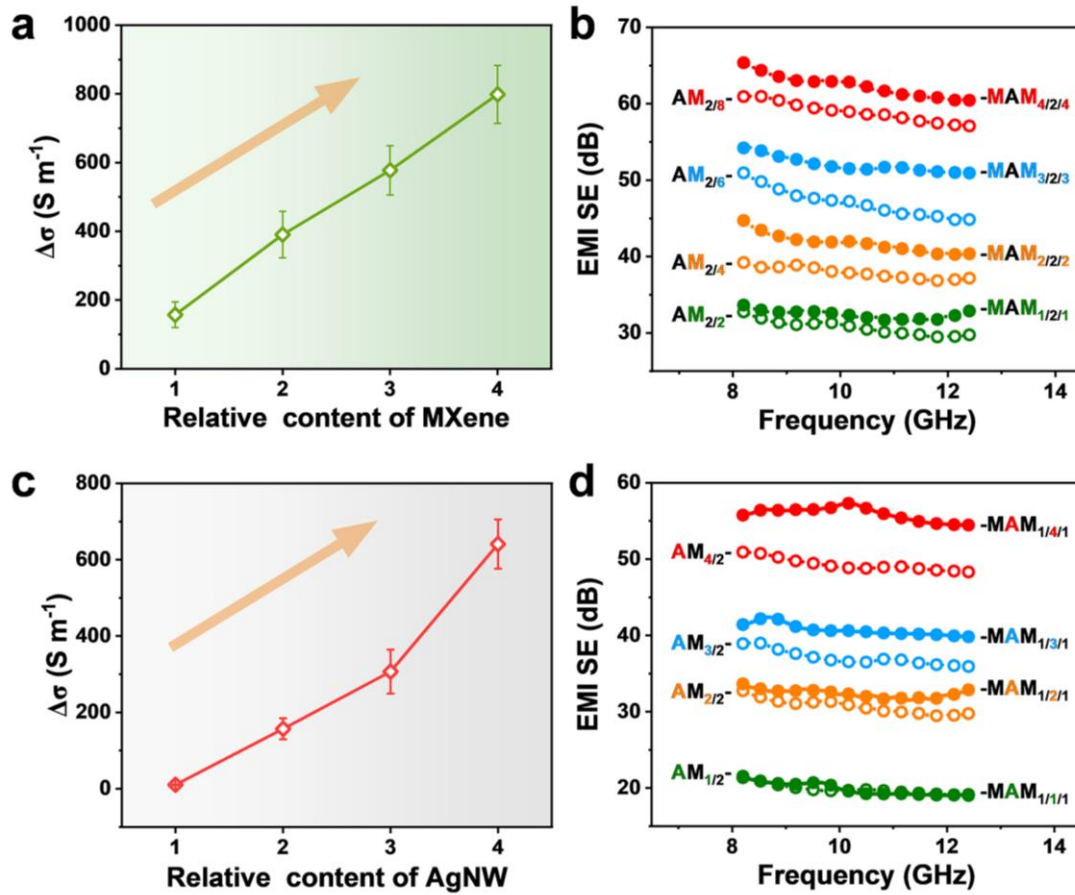

**Fig. S15** (a) Conductivity difference  $\Delta\sigma$  between  $AM_{2/2\alpha}$  and  $MAM_{\alpha/2/\alpha}$  conductive layers. Ag content  $\beta$  is fixed at 2 and MXene content  $2\alpha$  increases from 1 to 4. (b) EMI SE curves of CN/ $AM_{2/2\alpha}$ /CN and CN/ $MAM_{\alpha/2/\alpha}$ /CN films. Ag content  $\beta$  is fixed at 2 and MXene content  $2\alpha$  increases from 1 to 4. (c) Conductivity difference  $\Delta\sigma$  between  $AM_{\beta/2}$  and  $MAM_{1/\beta/1}$  conductive layers. MXene content  $2\alpha$  is fixed at 2 and Ag content  $\beta$  increases from 1 to 4. (d) EMI SE curves of CN/ $AM_{\beta/2}$ /CN and CN/ $MAM_{1/\beta/1}$ /CN films. MXene content  $2\alpha$  is fixed at 2 and Ag content  $\beta$  increases from 1 to 4.

At a fixed Ag content, the continuous increase in  $\Delta\sigma$  and  $\Delta SE$  demonstrates the enhanced welding effect by more MXene (Fig S15a-b). Similarly, at a fixed MXene content, both  $\Delta\sigma$  and  $\Delta SE$  increases with Ag nanowire junctions, indicating that more Ag nanowire junctions are well-welded (Fig S15c-d).

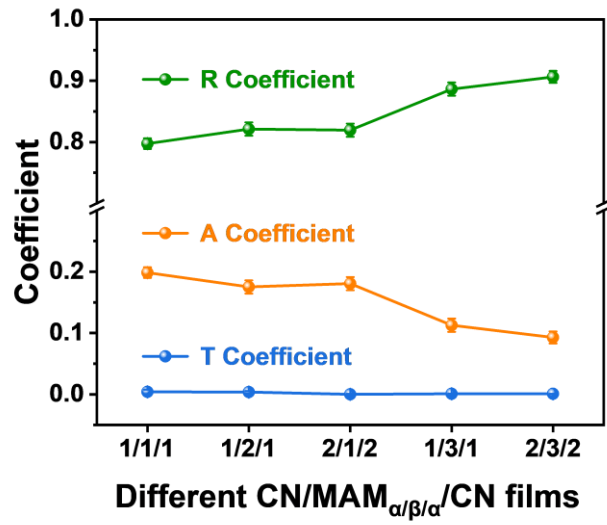

**Fig. S16** The average A, R and T power coefficients of different CN/MAM<sub>α/β/α</sub>/CN films.

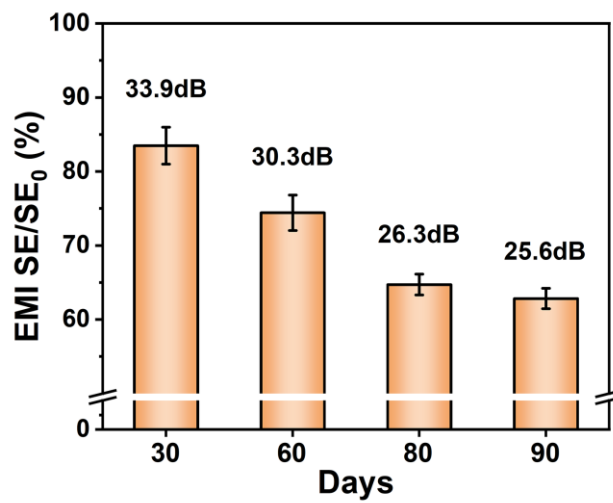

**Fig. S17** Retention rates of the average SE values of CN/MAM<sub>1/3/1</sub> film after 30, 60, 80 and 90 days.

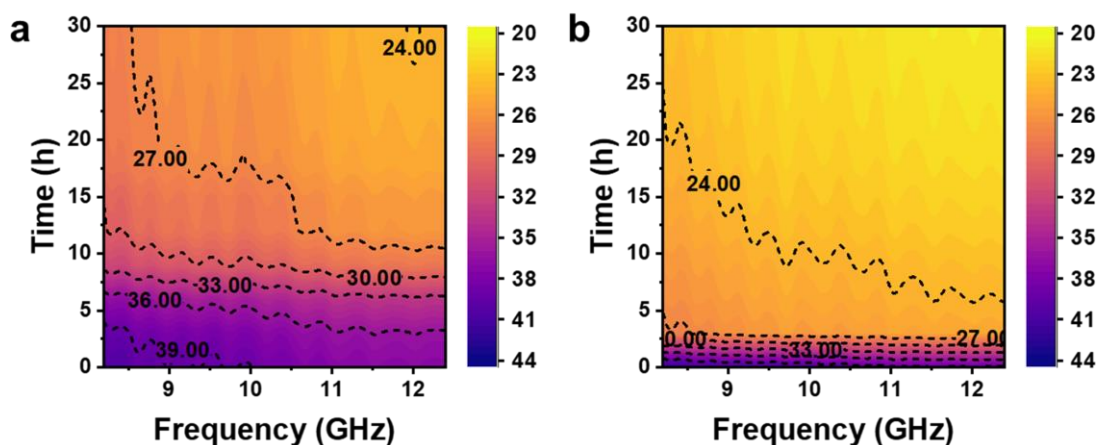

**Fig. S18** 3D projection of EMI SE curves of (a) CN/MAM<sub>1/3/1</sub>/CN and (b) CN/MAM<sub>1/3/1</sub> films heated at 200 °C for 30 h.

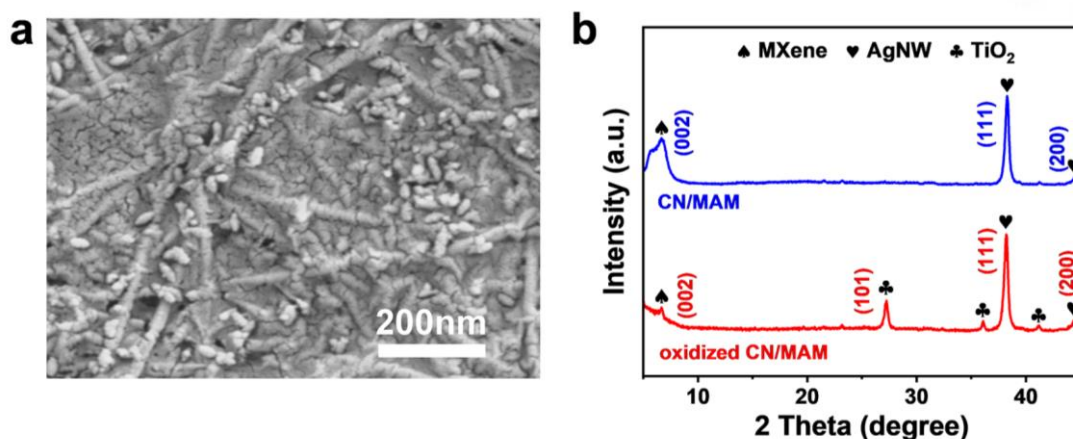

**Fig. S19** (a) SEM image of CN/MAM<sub>1/3/1</sub> film after heating at 200 °C for 3 h. (b) XRD patterns of the pristine CN/MAM<sub>1/3/1</sub> film and the CN/MAM<sub>1/3/1</sub> film after heating at 200 °C for 3 h.

Fig. S19a shows the formation of TiO<sub>2</sub> nanoparticles on MXene sheets after heating at 200 °C for 3 h. Compared with the XRD pattern of pristine CN/MAM<sub>1/3/1</sub> film, a clear diffraction peak of TiO<sub>2</sub> appears in the XRD pattern after heating at 200 °C for 3 h.

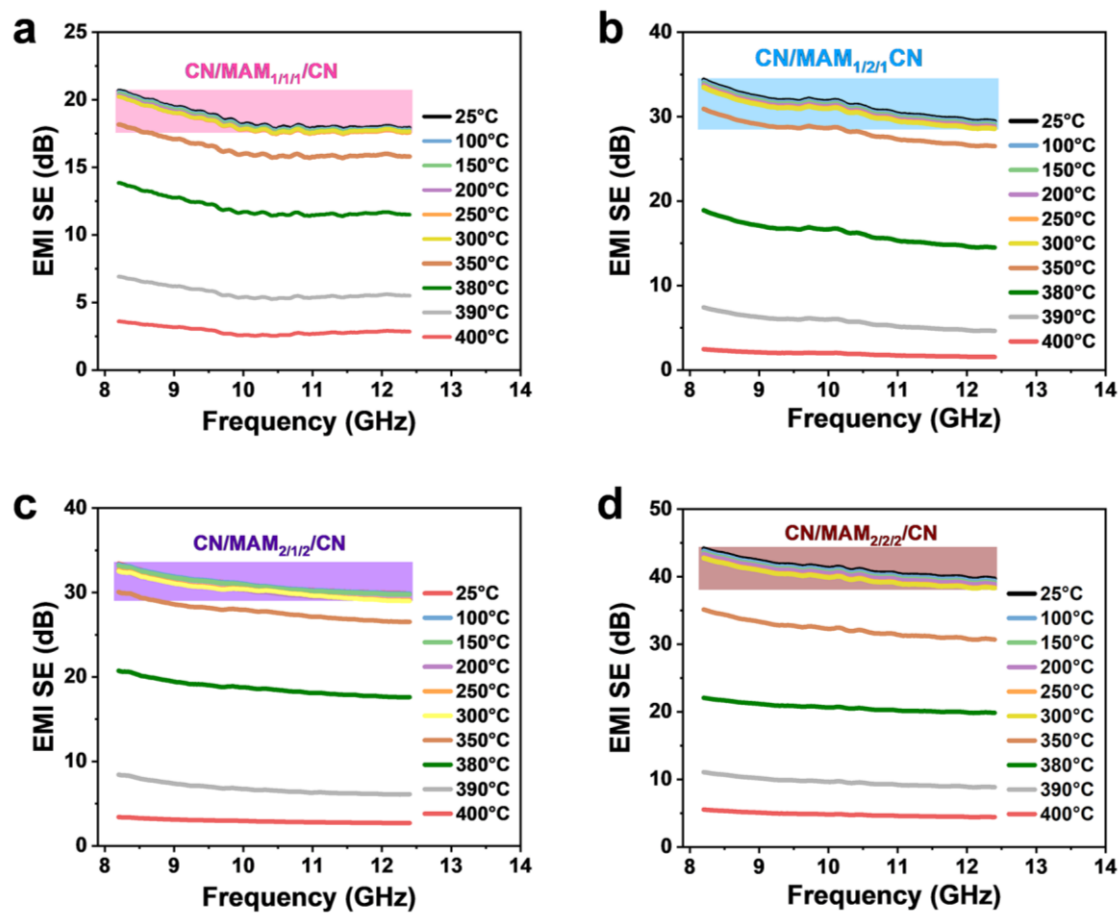

**Fig. S20** EMI SE curves of (a) CN/MAM<sub>1/1/1</sub>/CN, (b) CN/MAM<sub>1/2/1</sub>/CN, (c) CN/MAM<sub>2/1/2</sub>/CN, and (d) CN/MAM<sub>2/2/2</sub>/CN films from room temperature to 400 °C.

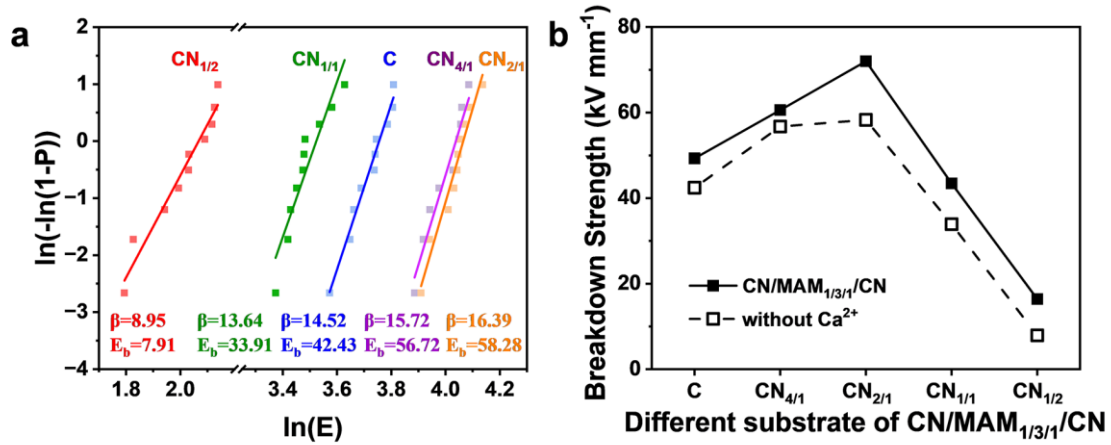

**Fig. S21** (a) Weibull plots and (b) breakdown strength  $E_b$  of  $CN_{x/y}/MAM/CN_{x/y}$  films without  $Ca^{2+}$ .

The two-parameter statistics, Weibull distribution, is widely used to evaluate the probability of breakdown:<sup>1</sup>

$$P(E) = 1 - \exp \left[ -\left( \frac{E}{E_b} \right)^\beta \right] \quad (S1)$$

where  $P(E)$  is the cumulative probability of electric breakdown failure,  $E$  is the tested breakdown strength,  $E_b$  is the standard breakdown strength of the material when the cumulative probability is 63.2%, and  $\beta$  is the shape parameter. Generally, the larger  $\beta$  value, the higher the stability of the material breakdown. To obtain  $E_b$  and  $\beta$  values, we can take the logarithm of both sides of Equation (S1), and then get a simple linear function:

$$\ln[-\ln(1 - P)] = \beta(\ln E - \ln E_b) \quad (S2)$$

Moreover, the empirical distribution function is obtained by the Bernard's median rank estimator formula:<sup>2</sup>

$$P_i(E) = (i - 0.3)/(n + 0.4) \quad (S3)$$

where  $i$  refers to the order of tested breakdown strength from smallest to largest,  $n$  is the total number of the sample tested.

**Table S1** Oxygen transmission rate (OTR,  $\text{cm}^3 \text{m}^{-2} \text{d}^{-1} \text{atm}^{-1}$ ) and oxygen permeability (OP,  $\text{cm}^3 \mu\text{m} \text{m}^{-2} \text{d}^{-1} \text{atm}^{-1}$ ) of composite films.

| Samples                                                            | Average thickness ( $\mu\text{m}$ ) | 45%RH OTR ( $\text{cm}^3 \text{m}^{-2} \text{d}^{-1} \text{atm}^{-1}$ ) | 45%RH OP ( $\text{cm}^3 \mu\text{m} \text{m}^{-2} \text{d}^{-1} \text{atm}^{-1}$ ) | 95%RH OTR ( $\text{cm}^3 \text{m}^{-2} \text{d}^{-1} \text{atm}^{-1}$ ) | 95%RH OP ( $\text{cm}^3 \mu\text{m} \text{m}^{-2} \text{d}^{-1} \text{atm}^{-1}$ ) |
|--------------------------------------------------------------------|-------------------------------------|-------------------------------------------------------------------------|------------------------------------------------------------------------------------|-------------------------------------------------------------------------|------------------------------------------------------------------------------------|
| C/MAM/C                                                            | 8±0.23                              | 16.09                                                                   | 128.72                                                                             | 1425.48                                                                 | 11403.84                                                                           |
| CN <sub>4/1</sub> /MAM/CN <sub>4/1</sub>                           | 10±0.35                             | 0.1431                                                                  | 1.431                                                                              | 216.71                                                                  | 2167.1                                                                             |
| CN <sub>2/1</sub> /MAM/CN <sub>2/1</sub>                           | 12±0.34                             | 0.04897                                                                 | 0.5876                                                                             | 17.52                                                                   | 210.24                                                                             |
| CN <sub>1/1</sub> /MAM/CN <sub>1/1</sub>                           | 13±0.28                             | 0.04952                                                                 | 0.6438                                                                             | 13.575                                                                  | 176.47                                                                             |
| CN <sub>1/2</sub> /MAM/CN <sub>1/2</sub>                           | 14±0.32                             | 0.07443                                                                 | 1.042                                                                              | 12.02                                                                   | 168.28                                                                             |
| CN <sub>2/1</sub> /MAM/CN <sub>2/1</sub> -without Ca <sup>2+</sup> | 12±0.51                             | 0.05262                                                                 | 0.6314                                                                             | 23.14                                                                   | 277.68                                                                             |
| CN <sub>2/1</sub> /MAM <sub>1/3/1</sub> /CN <sub>2/1</sub>         | 12.1±0.27                           | 0.04643                                                                 | 0.5618                                                                             | 17.83                                                                   | 215.74                                                                             |



**Table S2** Flammability data of composite films.

| Samples                                  | Weight (g) | Afterglow time (s) <sup>a</sup> | Residue (%) | Damaged length (mm) | Limiting oxygen index (%) |
|------------------------------------------|------------|---------------------------------|-------------|---------------------|---------------------------|
| C/MAM/C                                  | 0.105      | 9.5                             | <1          | ~80                 | 20.6                      |
| CN <sub>4/1</sub> /MAM/CN <sub>4/1</sub> | 0.121      | 6.0                             | 41          | ~62                 | 44.1                      |
| CN <sub>2/1</sub> /MAM/CN <sub>2/1</sub> | 0.134      | 0.1                             | 84          | ~41                 | 74.5                      |

<sup>a</sup> Afterglow time refers to the time of continuous flameless combustion.

**Table S3** Characteristic parameters of microscale combustion calorimetry of composite films.

| Samples                                  | PHRR (W g <sup>-1</sup> ) <sup>a</sup> | THR (kJ g <sup>-1</sup> ) <sup>b</sup> | T <sub>PHRR</sub> (°C) <sup>c</sup> |
|------------------------------------------|----------------------------------------|----------------------------------------|-------------------------------------|
| C/MAM/C                                  | 117.3                                  | 3.8                                    | 277.7                               |
| CN <sub>4/1</sub> /MAM/CN <sub>4/1</sub> | 57.1                                   | 2.1                                    | 280.2                               |
| CN <sub>2/1</sub> /MAM/CN <sub>2/1</sub> | 40.1                                   | 1.2                                    | 287.3                               |

<sup>a</sup> PHRR refers to the peak heat release rate; <sup>b</sup> THR refers to the total heat released; <sup>c</sup> T<sub>PHRR</sub> refers to the peak temperature of peak heat release rate.

**Table S4** Comparison of the SE/t values of transparent/translucent flexible EMI shielding films.

|              | Materials                            | Substrate              | Thickness ( $\mu\text{m}$ ) | EMI SE (dB) | SE/t ( $\text{dB cm}^{-1}$ ) | Ref |
|--------------|--------------------------------------|------------------------|-----------------------------|-------------|------------------------------|-----|
| AgNW-based   | AgNW                                 | PMMA                   | 250                         | 33          | 1320.0                       | 3   |
|              | Fe <sub>3</sub> O <sub>4</sub> /AgNW | PET                    | 50                          | 26.2        | 5240.0                       | 4   |
|              | AgNF                                 | PET                    | 120                         | 58          | 4833.3                       | 5   |
|              | AgNW                                 | Gelatin                | 27                          | 37.74       | 13977.8                      | 6   |
|              | AgNW                                 | Glass                  | 50                          | 31.3        | 6260.0                       | 7   |
|              | AgNW                                 | SA                     | 25                          | 27.9        | 11160.0                      | 8   |
|              | AgNW                                 | PET                    | 150                         | 29          | 1933.3                       | 9   |
|              | AgNW                                 | Cellulose              | 145                         | 39          | 2696.6                       | 10  |
| Carbon-based | RGO/AgNW                             | PET                    | 100                         | 30          | 3000                         | 11  |
|              | GNS/AgNW                             | -                      | 30                          | 38          | 12666.7                      | 12  |
|              | RGO                                  | PEI                    | 4                           | 6.37        | 15925.0                      | 13  |
| MXene-based  | MXene/AgNW                           | PET                    | 125                         | 23.7        | 1896.0                       | 14  |
|              | MXene-SWCNT                          | Glass                  | 1000                        | 3.3         | 33                           | 15  |
|              | MXene/AgNW                           | PU                     | 450                         | 32.5        | 722.2                        | 16  |
|              | MXene/AgNW                           | PET                    | 125                         | 27.1        | 2168                         | 17  |
|              | MXene/AgNW                           | PET                    | 100                         | 32.5        | 3250                         | 18  |
| This work    | CN/MAM <sub>1/1/1</sub> /CN          | Cellulose/<br>Nanoclay | 12                          | 19.9        | 16583.3                      |     |
|              | CN/MAM <sub>1/2/1</sub> /CN          |                        |                             | 32.4        | 27000.0                      |     |
|              | CN/MAM <sub>2/1/2</sub> /CN          |                        |                             | 31.7        | 26416.6                      |     |
|              | CN/MAM <sub>1/3/1</sub> /CN          |                        |                             | 40.7        | 33916.6                      |     |
|              | CN/MAM <sub>2/2/2</sub> /CN          |                        |                             | 41.7        | 34750.0                      |     |

## Supplementary references

1. B. C. Luo, Z. H. Shen, Z. M. Cai, E. K. Tian, Y. Yao, B. W. Li, A. Kursumovic, J. L. MacManus-Driscoll, L. T. Li, L. Q. Chen and X. H. Wang, *Adv. Funct. Mater.*, 2021, **31**, 11.
2. L. F. Zhang, M. Xie and L. C. Tang, *Qual. Reliab. Eng. Int.*, 2006, **22**, 905-917.
3. X. Zhang, Y. L. Zhong and Y. Yan, *Phys. Status Solidi A-Appl. Mat.*, 2018, **215**, 5.
4. Z. X. Wang, B. Jiao, Y. C. Qing, H. Y. Nan, L. Q. Huang, W. Wei, Y. Peng, F. Yuan, H. Dong, X. Hou and Z. X. Wu, *ACS Appl. Mater. Interfaces*, 2020, **12**, 2826-2834.
5. S. Lin, H. Y. Wang, F. Wu, Q. M. Wang, X. P. Bai, D. Zu, J. N. Song, D. Wang, Z. L. Liu, Z. W. Li, N. Tao, K. Huang, M. Lei, B. Li and H. Wu, *npj Flex. Electron.*, 2019, **3**, 8.
6. G. H. Wang, L. L. Hao, X. D. Zhang, S. J. Tan, M. Zhou, W. H. Gu and G. B. Ji, *J. Colloid Interface Sci.*, 2022, **607**, 89-99.
7. X. Z. Zhu, J. Xu, F. Qin, Z. Y. Yan, A. Q. Guo and C. X. Kan, *Nanoscale*, 2020, **12**, 14589-14597.
8. H. J. Wang, J. H. Guo, Y. T. Lei, W. Y. Chen, Z. C. Zhang, M. Zhu and H. L. Xu, *ACS Appl. Nano Mater.*, 2024, **7**, 2100-2109.
9. X. Z. Zhu, A. Q. Guo, Z. Y. Yan, F. Qin, J. Xu, Y. D. Ji and C. X. Kan, *Nanoscale*, 2021, **13**, 8067-8076.
10. M. Zhu, X. X. Yan, X. Li, L. Dai, J. H. Guo, Y. T. Lei, Y. J. Xu and H. L. Xu, *ACS Appl. Mater. Interfaces*, 2022, **14**, 45697-4570610.
11. D. G. Kim, J. H. Choi, D. K. Choi and S. W. Kim, *ACS Appl. Mater. Interfaces*, 2018, **10**, 29730-29740.
12. N. Zhang, Z. Wang, R. G. Song, Q. L. Wang, H. Y. Chen, B. Zhang, H. F. Lv, Z. Wu and D. P. He, *Sci. Bull.*, 2019, **64**, 540-546.
13. S. Kim, J. S. Oh, M. G. Kim, W. Jang, M. Wang, Y. Kim, H. W. Seo, Y. C. Kim, J. H. Lee, Y. Lee and J. D. Nam, *ACS Appl. Mater. Interfaces*, 2014, **6**, 17647-17653.
14. W. Chen, L. X. Liu, H. B. Zhang and Z. Z. Yu, *ACS Nano*, 2020, **14**, 16643-16653.
15. G. M. Weng, J. Y. Li, M. Alhabeb, C. Karpovich, H. Wang, J. Lipton, K. Maleski, J. Kong, E. Shaulsky, M. Elimelech, Y. Gogotsi and A. D. Taylor, *Adv. Funct. Mater.*, 2018, **28**, 9.
16. Z. C. Wang, P. Wang, W. X. Cao, C. Q. Sun, Z. C. Song, D. C. Ji, L. Yang, J. C. Han and J. Q. Zhu, *J. Mater. Chem. C*, 2022, **10**, 17066-17074.
17. Y. S. Zhang, T. Wang, Z. L. Bao, P. F. Qian, X. C. Liu, W. H. Geng, D. Zhang, S. W. Wang, Q. X. Zhu and H. Z. Geng, *J. Colloid Interface Sci.*, 2024, **665**, 376-388.
18. M. Jin, W. Chen, L. X. Liu, H. B. Zhang, L. X. Ye, P. Min and Z. Z. Yu, *J. Mater. Chem. A*, 2022, **10**, 14364-14373.
